# Supplementary material
Source: MDPI journal article supplement (https://www.mdpi.com/2225-1154/10/7/95)
Supplement: s1 [file s1]

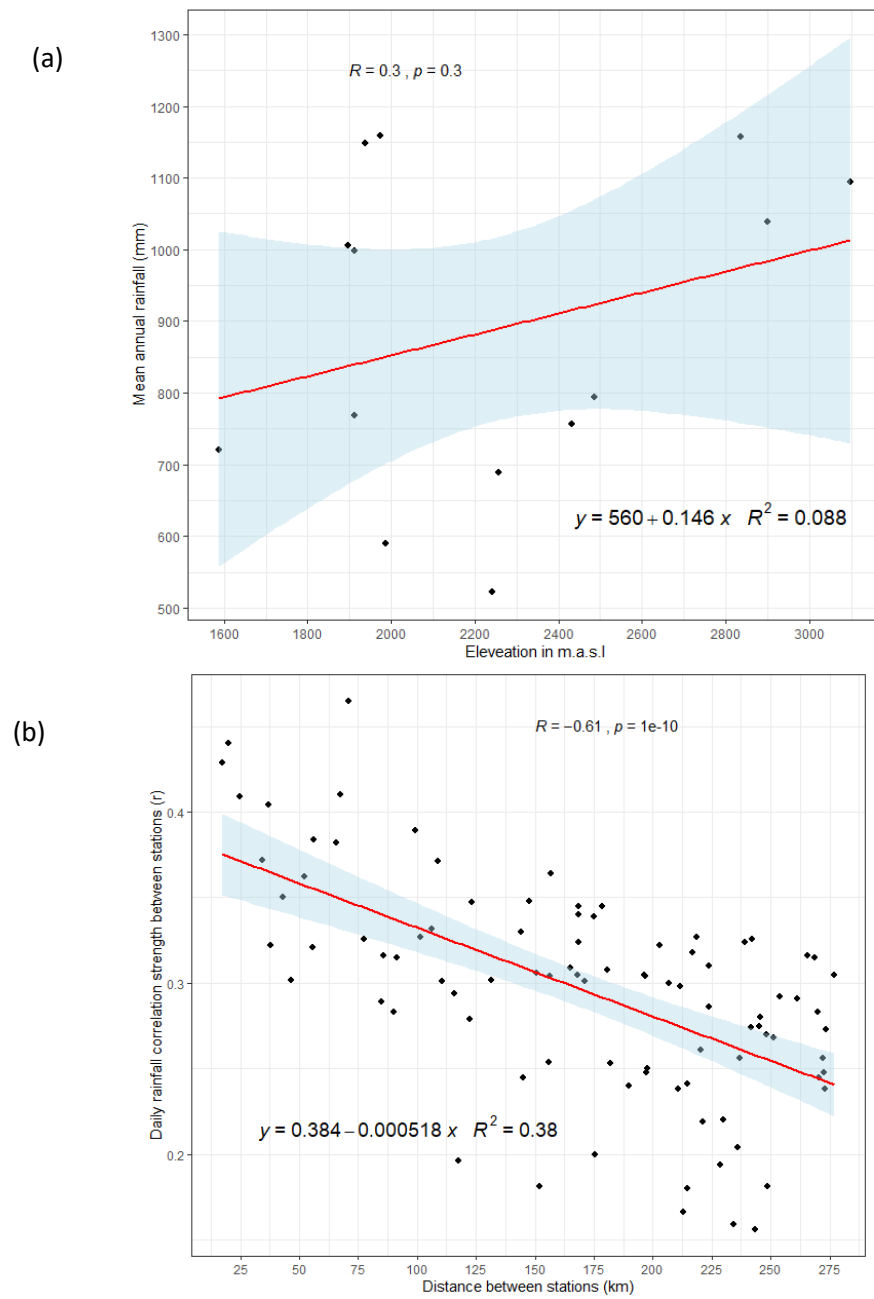

Figure S1: **(a)** Relation between altitude and rainfall and **(b)** Correlation of distance between stations and their rainfall correlation strength.  $R$  is the correlation coefficient while  $p$  represents the probability value

Table S1: The evaluation result at Adwa station showing the historical performance of all models under each of the four evaluation metrics considered and average to all metrics

| Climate Models | Climate models performance result from each evaluation metrics |          |           |                         | Climate models rank under each metrics ('1' best to '21' poor) |          |             |        |               |
|----------------|----------------------------------------------------------------|----------|-----------|-------------------------|----------------------------------------------------------------|----------|-------------|--------|---------------|
|                | RMSE (mm)                                                      | MAE (mm) | PBIAS (%) | Pearson Correlation (r) | RMSE rank                                                      | MAE rank | PBIAS  rank | r rank | Average score |
| M1             | 8.8                                                            | 3.9      | 44.7      | 0.14                    | 17                                                             | 20       | 13          | 19     | 17.3          |
| M2             | 6.5                                                            | 2.3      | -61.5     | 0.25                    | 3                                                              | 2        | 18          | 6      | 7.3           |
| M3             | 9.8                                                            | 4.1      | 78.9      | 0.24                    | 21                                                             | 21       | 20          | 8      | 17.5          |
| M4             | 8.8                                                            | 3.2      | 14.2      | 0.20                    | 16                                                             | 17       | 5           | 15     | 13.3          |
| M5             | 9.1                                                            | 3.9      | 48.5      | 0.16                    | 19                                                             | 19       | 15          | 18     | 17.8          |
| M6             | 6.7                                                            | 2.7      | -24.7     | 0.24                    | 8                                                              | 9        | 10          | 9      | 9.0           |
| M7             | 7.1                                                            | 2.8      | -6.7      | 0.27                    | 14                                                             | 13       | 4           | 5      | 9.0           |
| M8             | 8.9                                                            | 3.5      | 27.9      | 0.19                    | 18                                                             | 18       | 11          | 17     | 16.0          |
| M9             | 7.0                                                            | 2.7      | -20.2     | 0.23                    | 12                                                             | 10       | 8           | 10     | 10.0          |
| M10            | 7.2                                                            | 2.7      | -23.8     | 0.21                    | 15                                                             | 11       | 9           | 12     | 11.8          |
| M11            | 9.2                                                            | 3.1      | -2.4      | 0.19                    | 20                                                             | 16       | 1           | 16     | 13.3          |
| M12            | 6.9                                                            | 2.3      | -72.4     | 0.14                    | 11                                                             | 3        | 19          | 20     | 13.3          |
| M13            | 6.7                                                            | 2.4      | -47.4     | 0.21                    | 9                                                              | 7        | 14          | 13     | 10.8          |
| M14            | 6.7                                                            | 2.2      | -89.8     | 0.14                    | 7                                                              | 1        | 21          | 21     | 12.5          |
| M15            | 6.6                                                            | 2.4      | -40.9     | 0.27                    | 5                                                              | 6        | 12          | 4      | 6.8           |
| M16            | 6.8                                                            | 2.4      | -51.4     | 0.22                    | 10                                                             | 5        | 16          | 11     | 10.5          |
| M17            | 6.7                                                            | 2.3      | -61.5     | 0.21                    | 6                                                              | 4        | 17          | 14     | 10.3          |
| M18            | 6.0                                                            | 2.5      | -17.0     | 0.39                    | 1                                                              | 8        | 7           | 1      | 4.3           |
| M19            | 6.4                                                            | 3.0      | 15.3      | 0.30                    | 2                                                              | 15       | 6           | 2      | 6.3           |
| M20            | 6.5                                                            | 2.7      | -5.6      | 0.29                    | 4                                                              | 12       | 3           | 3      | 5.5           |
| M21            | 7.1                                                            | 2.9      | 3.9       | 0.25                    | 13                                                             | 14       | 2           | 7      | 9.0           |

N.B. The colour scale is for each column and ranges from “green” best to “red” poor skill.

Table S2: Statistical error measure values for the three-interpolation method at each evaluation points (in left side) and the weighted score of each interpolation method (in the right side).

| Evaluation points | Interpolation method | RMS E | MAE | PBIAS | Interpolation method                                     | ID W | EBK | O K |
|-------------------|----------------------|-------|-----|-------|----------------------------------------------------------|------|-----|-----|
| <b>P1</b>         | <b>IDW</b>           | 235   | 225 | 26.3  | <b>P1</b>                                                | 3    | 1   | 2   |
|                   | <b>EBK</b>           | 198   | 185 | 21.7  | <b>P2</b>                                                | 1    | 2   | 3   |
|                   | <b>OK</b>            | 220   | 200 | 23.4  | <b>P3</b>                                                | 3    | 1   | 2   |
| <b>P2</b>         | <b>IDW</b>           | 147   | 135 | 19.8  | <b>P4</b>                                                | 1.7  | 3.0 | 1.3 |
|                   | <b>EBK</b>           | 204   | 188 | 27.9  | <b>P5</b>                                                | 3    | 1   | 2   |
|                   | <b>OK</b>            | 218   | 201 | 29.8  | <i>Average rank</i>                                      | 2.3  | 1.6 | 2.1 |
| <b>P3</b>         | <b>IDW</b>           | 160   | 137 | -16.5 | N.B. "1" is the best score while "3" is the least score. |      |     |     |
|                   | <b>EBK</b>           | 100   | 82  | -5.4  |                                                          |      |     |     |
|                   | <b>OK</b>            | 121   | 102 | -8.3  |                                                          |      |     |     |
| <b>P4</b>         | <b>IDW</b>           | 153   | 119 | -5.9  |                                                          |      |     |     |
|                   | <b>EBK</b>           | 164   | 123 | -7.2  |                                                          |      |     |     |
|                   | <b>OK</b>            | 155   | 116 | -5.7  |                                                          |      |     |     |
| <b>P5</b>         | <b>IDW</b>           | 111   | 97  | -9.8  |                                                          |      |     |     |
|                   | <b>EBK</b>           | 83    | 70  | -4.3  |                                                          |      |     |     |
|                   | <b>OK</b>            | 92    | 76  | -5.5  |                                                          |      |     |     |

Table S3: Station level comparison result between CRU and observed rainfall data at monthly time step

| Stations    | RMSE  | MAE   | PBIAS  | Pearson Correlation (r) |
|-------------|-------|-------|--------|-------------------------|
| Hawzen      | 32.67 | 17.92 | 5.25   | 0.89                    |
| MekelleAP   | 41.04 | 24.13 | -13.95 | 0.88                    |
| Lalibela    | 42.70 | 28.54 | 23.14  | 0.91                    |
| Maichew     | 44.18 | 28.75 | -25.24 | 0.84                    |
| Wukro       | 45.09 | 21.99 | -15.36 | 0.88                    |
| Adwa        | 46.19 | 26.62 | -29.44 | 0.89                    |
| Ambagiorgis | 49.00 | 31.52 | 9.58   | 0.90                    |
| Gonder      | 52.52 | 27.22 | -10.21 | 0.91                    |
| Enfraz      | 55.63 | 34.25 | 4.91   | 0.92                    |
| Maksegnit   | 55.95 | 35.62 | 8.16   | 0.90                    |
| Nefasmewcha | 56.19 | 35.78 | 14.46  | 0.88                    |
| Alamata     | 56.23 | 37.40 | -16.87 | 0.75                    |
| Debark      | 69.26 | 35.65 | -25.99 | 0.88                    |
| Shire       | 69.43 | 39.81 | -43.85 | 0.88                    |

N.B. The colour scale is for each column and ranges from “green” best to “red” poor skill. The same interpretation to Table 6.
